**The Predictive Value of Diaphragm Muscle Ultrasound for  
Ventilator Weaning Outcomes after Spinal Cord Injury:  
A Retrospective Case Series**

**Natasha S. Bhatia, MD<sup>1,2</sup>, Stephany Kunzweiler, PT, DPT<sup>1</sup>, Christopher Conley, RT<sup>1</sup>, Ki H. Kim, MD<sup>1,2</sup>, Adenike A. Adewuyi<sup>1,2,4</sup>, MD, PhD, Lisa F. Wolfe<sup>1,3,4</sup>, MD, Mary Kwasny, ScD<sup>5</sup>, Colin K. Franz, MD, PhD<sup>1,2,4\*</sup>**

<sup>1</sup>Shirley Ryan AbilityLab, Chicago, IL, USA

<sup>2</sup>Department of Physical Medicine and Rehabilitation, Northwestern University Feinberg School of Medicine, Chicago, IL, USA

<sup>3</sup>Division of Pulmonary and Critical Care Medicine, Department of Medicine, Northwestern University Feinberg School of Medicine. Chicago, IL, USA

<sup>4</sup>Ken and Ruth Davee Department of Neurology, Northwestern University Feinberg School of Medicine, Chicago, IL, USA

<sup>5</sup>Department of Preventive Medicine, Northwestern University Feinberg School of Medicine, Chicago, IL, USA

Short Running Title: Diaphragm Ultrasound and SCI Ventilator Weaning Outcomes

Manuscript Category: Original Article

\*Correspondence:

Colin K. Franz, MD, PhD

Physician/Scientist

355 E. Erie St, Chicago, IL 60611

312-238-1000

[cfranz@sralab.org](mailto:cfranz@sralab.org)

## **Abstract**

### Objectives

Neuromuscular respiratory failure after spinal cord injury (SCI) can lead to dependence on a ventilator. Ventilator-free breathing after SCI is associated with improved morbidity, mortality, and quality of life. We investigated the use of diaphragm muscle ultrasound to predict ventilator weaning outcomes after spinal cord injury.

### Methods

This is a retrospective case series conducted at a university-affiliated freestanding acute rehabilitation hospital. We identified patients with cervical spinal cord injury who had a tracheostomy and were dependent on an invasive mechanical ventilator at the time of admission to the rehabilitation unit. A diaphragm muscle ultrasound was performed, which included measurements of the thickness of the diaphragm and a calculation of the thickening ratio (TR), a marker of diaphragm contractility. The primary outcome measure was the need for mechanical ventilation at time of discharge from acute inpatient rehabilitation.

### Results

Of the 21 patients enrolled, 11 (52%) were able to wean successfully (partially or fully) from the ventilator. Of the ultrasound measurements that were taken, the TR was the optimal predictor for ventilator weaning outcomes. A threshold of  $TR \geq 1.2$  as the maximum hemidiaphragm measurement had a sensitivity of 1.0 and specificity of 0.90 for predicting ventilator weaning.

### Conclusion

Normal diaphragm contractility ( $TR \geq 1.2$ ) as determined by diaphragm muscle ultrasound is a strong positive predictor for successful ventilator weaning in patients with cervical spinal cord injury. Diaphragm ultrasound can guide clinical practice by assisting in prognosticating the ability to wean from a ventilator after cervical SCI.

Keywords: diaphragm muscle, neuromuscular, ultrasound, ventilator weaning, spinal cord injury

## **1. Introduction**

Dependence on a ventilator after spinal cord injury (SCI) has important implications for morbidity, mortality, and quality of life. People with SCI who rely on mechanical ventilation are almost 40 times more likely to die during the first year after injury compared to those who are not ventilator-dependent.<sup>1</sup> Various studies have shown that long-term mortality rates remain up to 3.5 times higher for those who require mechanical ventilation after the first year of injury.<sup>1,2</sup> Intuitively, the excess mortality for ventilator-dependent people with SCI compared to people with SCI who are not ventilator dependent is predominantly a result of respiratory disorders, and the most common causes of death for ventilator-dependent people with SCI are pneumonia and other respiratory complications.<sup>3</sup> Not surprisingly, patients with SCI who are ventilator-dependent report a more negative perception of their health status, lower social integration scores, and worse quality of life outcomes compared to people living with SCI who do not require a ventilator.<sup>4</sup> Clearly, the ability to wean from the ventilator after SCI has a significant impact on overall quality of life.

Respiratory failure after spinal cord injury is a result of dysfunction of both ventilation and airway clearance.<sup>5</sup> The primary muscle of inspiration, the diaphragm, is innervated by the phrenic nerve which originates from the C3, C4, and C5 nerve roots, with C4 providing primary innervation.<sup>6</sup> The neurologic level of injury (NLI) after SCI is thus a critical factor in the need for mechanical ventilation, though even among patients with the same NLI, outcomes for successful ventilator weaning can vary. Patients with a neurologically complete SCI at the C1-2 levels are typically not able to achieve ventilator-free breathing, though some studies have shown the possibility of weaning in rare cases.<sup>7</sup> For those with a NLI at C3, ventilator-free breathing

rates vary from 25-50%.<sup>7,8</sup> For those with NLI at C4, up to 70-80% of patients can successfully wean from the ventilator, and an even higher percentage achieve ventilator-free breathing with a NLI at C5-6 and below.<sup>7-9</sup> This variability even within each neurologic level illustrates the need for additional clinical tools to both determine readiness for ventilator weaning and serve as an accurate predictor for successful ventilator-free breathing outcomes.

Current clinical tools used in the evaluation of ventilator weaning readiness and to predict ventilator-free breathing include bedside spirometry and respiratory function parameters (such as vital capacity and negative inspiratory force), fluoroscopic evaluation of the diaphragm, phrenic nerve conduction studies (NCS), and needle electromyography (EMG) of the diaphragm muscle.<sup>9</sup> While bedside spirometry and fluoroscopic evaluation of the diaphragm are non-invasive methods to diagnose diaphragm dysfunction, they are less sensitive than other techniques.<sup>9</sup> Conversely, while needle EMG and phrenic NCS are sensitive tests for diaphragm dysfunction, these methods are more invasive and require a highly skilled practitioner to perform the procedures and interpret the results. Moreover, needle EMG of the diaphragm can be associated with risk of diaphragm injury and pneumothorax, while phrenic NCS has a high false positive rate associated with lack of response on NCS despite intact diaphragm muscle innervation.<sup>10</sup>

Ultrasound of the diaphragm muscle has been used to evaluate diaphragm function and contractility in the context of a variety of disorders including phrenic nerve injury, direct diaphragm injury, lung transplantation, and more recently, respiratory dysfunction after COVID-19 infection.<sup>11,12</sup> There are several protocols published for diaphragm ultrasound evaluation<sup>12</sup>—

we adopted the protocol published by Boon and colleagues from Mayo Clinic since it corresponds to the normative data set, and was taken from a similar population of healthy controls within the same geographic area as our study population.<sup>10</sup> Typically, the sonographic evaluation includes a B-mode examination of each hemidiaphragm, with measurements of the thickness of the hemidiaphragm muscle both at maximal inspiration (i.e. total lung capacity, TLC) and at end expiration (i.e. functional residual capacity, FRC).<sup>11</sup> At FRC in the zone of apposition, a diaphragm thickness of  $\geq 0.15$ cm is considered normal, with a thickness less than this cutoff consistent with diaphragm atrophy.<sup>10</sup> From these two measurements of diaphragm size, a thickening ratio (TR) can be calculated, where  $TR = \text{thickness at TLC} / \text{thickness at FRC}$  (**Figure 1**). The TR reflects diaphragm muscle contractility, with a normal  $TR \geq 1.2$ .<sup>10</sup> Prior work from Boon and colleagues has reported a 93% sensitivity and 100% specificity of this mode of diaphragm ultrasound in identifying neuromuscular diaphragm dysfunction from phrenic neuropathy.<sup>11</sup>

The purpose of this study was to investigate the efficacy of diaphragm muscle ultrasound to predict ventilator weaning outcomes after cervical spinal cord injury in patients dependent on mechanical ventilation.

## **2. Materials and Methods**

This study is a retrospective case series via chart review of data obtained as part of routine patient care where the sonographer was not blinded to the patient's diagnosis. The study received approval from Northwestern University's Institutional Review Board (IRB) under approval number STU23625789. This included a waiver of informed consent, justified by the minimal risk to subjects and the impracticality of obtaining consent for this review. The IRB's approval

ensured compliance with ethical principles, including patient privacy and data confidentiality, in line with the Declaration of Helsinki.

This study was conducted at a university-affiliated freestanding acute rehabilitation hospital. We identified patients with cervical spinal cord injury who had a tracheostomy and were dependent on invasive mechanical ventilation for any number of hours at the time of admission to the rehabilitation unit, and who were referred for a neuromuscular diaphragm ultrasound. We collected demographic and clinical data including time from injury, American Spinal Injury Association (ASIA) Impairment Scale (AIS) neurologic level of injury and completeness of injury, and number of hours per day spent on the ventilator.

A diaphragm muscle ultrasound was performed by a practicing physician (CKF) board certified in both Physical Medicine and Rehabilitation and Neuromuscular Medicine, and who holds the Neuromuscular Ultrasound Certificate of Added Qualification (American Board of Electrodiagnostic Medicine). This study followed a protocol for diaphragm ultrasound evaluation as previously published by Farr et al, based on Boon's original study.<sup>10,13</sup> Our sonographic evaluation of the bilateral hemidiaphragms included examination of each hemidiaphragm using a low intercostal approach (8<sup>th</sup> or 9<sup>th</sup> intercostal space) along the anterior axillary line. The ultrasound evaluation included measurements of the thickness of each hemidiaphragm at maximal inhalation (or TLC) and exhalation (or FRC), as well as a calculation of the TR as a marker of diaphragm contractility. As these measures are taken bilaterally (one measure for each hemidiaphragm), we considered the maximum or best measure bilaterally to determine if this function may be predictive of the ability to wean from the ventilator.



The primary outcome measure was the need for mechanical ventilation at the time of discharge from acute inpatient rehabilitation. The outcomes of patients in our data set could be grouped into two categories: no meaningful ventilator weaning (off ventilator for <1 hour per day), and successful ventilator weaning (including both daytime ventilator-free breathing with nocturnal use of the ventilator, and full ventilator weaning). Because daytime ventilator-free breathing is associated with improvements in outcomes and quality of life, analysis was performed by categorizing patients as either successfully weaned from the ventilator (full or daytime) or not weaned. Logistic regression models were fit, and the area under the receiver operating characteristic curve was used to determine the best predictor of successful (full or partial) weaning. Sensitivity and specificity were then calculated.

### **3. Results**

This retrospective case series followed 21 patients who were screened by ultrasound for their candidacy for ventilator weaning during their inpatient rehabilitation admission (**Table 1**). There were 19 male patients and 2 female patients, with an average age of 44 years (range = 17-78). All patients sustained a traumatic cervical spinal cord injury, ranging from C1-C5 neurologic level of injury, and ASIA Impairment Scale (AIS) A-C. All patients required mechanical ventilation via tracheostomy at the time of admission to acute inpatient rehabilitation.

At time of discharge, 11 patients (52%) achieved successful (full or daytime) ventilator-free breathing, while 10 patients did not achieve meaningful ventilator-free breathing. The mean TR calculated from the best hemidiaphragm measurement for patients who achieved ventilator-free breathing was 1.6, while the mean TR for patients who did not achieve ventilator weaning was

1.1 (**Table 2**). Median TR was also calculated for both groups given outlier data within the data set. The successfully weaned group had a median TR of 1.4, and the unsuccessfully weaned group had a median TR of 1.0.

Within our study population, all 11 patients who achieved successful ventilator weaning had a maximum TR of 1.2 or greater (**Table 3**), and 8 of those patients (72%) in this group had normal TRs bilaterally. Of the 10 patients who did not wean from the ventilator, 9 had impaired or absent contractility bilaterally, and only one patient had a normal maximum TR (patient #12).

The receiver operating characteristic curve was plotted with an area under the curve of 0.95, which indicates a high overall performance of the best thickening ratio as a diagnostic test for successful ventilator weaning at the chosen cutoff of 1.2. The sensitivity at this cutoff was 100%, indicating that all successful weaning cases were correctly identified using this cutoff. The specificity was 90%, indicating that 90% of the failures were correctly identified as such when using the cutoff of 1.2. A high sensitivity and specificity suggest that a cutoff of 1.2 for the best thickening ratio is a good threshold for predicting successful ventilator weaning.

#### **4. Discussion**

Achieving ventilator-free breathing after SCI impacts both morbidity/mortality outcomes and quality of life. The traditional approach to ventilator weaning after SCI involves consideration of a patient's neurologic level of injury and completeness of injury in conjunction with respiratory parameters (including vital capacity, negative inspiratory force, resting tidal volume, and CO<sub>2</sub>/arterial blood gas results) to determine readiness for ventilator weaning. Off ventilator trials

can begin once these respiratory parameters fall within safe guidelines. Once patients tolerate off ventilator trials, weaning may commence by following a progressive ventilator free breathing protocol, which has been shown to be the most successful method of ventilator weaning for people with SCI.<sup>14</sup>

The use of diaphragm ultrasound provides further valuable information about the diaphragm muscle's innervation status,<sup>15</sup> which is especially important in the case of patients with C3 or C4 level injuries where diaphragm dysfunction may be a consequence of mixed upper and lower motor neuron lesions, so retained partial innervation should not be assumed, and ventilator weaning outcomes are variable.

Our findings demonstrate that a normal thickening ratio as determined by diaphragm ultrasound evaluation is a strong predictor of successful ventilator-free breathing. Evidence of intact contractility on ultrasound can indicate weaning potential for patients who would typically not be expected to wean from the ventilator based on their injury levels. In our study, for example, two patients with C2 AIS A injuries were found to have intact contractility bilaterally and were both able to successfully wean from the ventilator. Conversely, evidence of abnormal diaphragm contractility can also indicate the need for caution with ventilator weaning attempts. Two patients who would be expected to retain some degree of diaphragm innervation given their injury level (C3 and C4 levels of injury) both displayed absent contractility bilaterally and were ultimately unable to wean from the ventilator. In our study, 4 of the 21 patients demonstrated a "split diaphragm," i.e. one hemidiaphragm with a normal thickening ratio, and one impaired. Of these four patients, only one was not able to wean from the ventilator. This patient had multiple

medical comorbidities that contributed to their inability to wean from the ventilator including recurrent ventilator-associated pneumonia requiring bronchoscopy during their rehabilitation course.

It is important to note that practice patterns and approaches to ventilator weaning across different treatment centers is non-uniform. Initial ventilator weaning trials often occur during a patient's acute hospitalization. However, for patients that are unable to fully wean from the ventilator at time of discharge from acute care, options for ongoing rehabilitation are often limited. Many acute inpatient rehabilitation facilities cannot accept patients who require mechanical ventilation given the associated need for adequate support from trained respiratory therapists, physiatrists, pulmonologists, and nursing staff. As such, ventilator weaning is often outside the scope of care of many acute rehabilitation facilities. In these cases, patients who require mechanical ventilation at time of discharge from acute care are sent to long term acute care facilities to attempt to wean off the ventilator prior to admission to an inpatient rehabilitation unit. This results in a delay in starting intensive rehabilitation therapies, which are critical in the early stages of recovery from spinal cord injury. Acute inpatient rehabilitation facilities that can manage patients on a ventilator are thus uniquely able to both provide intensive acute rehabilitation therapies and potentially work towards ventilator weaning. Clinical tools that can help better identify which patients may be able to successfully wean from a ventilator can help guide clinical practice and rehabilitation goal setting.

Within our treatment center, the application of our findings has contributed to the development of a treatment algorithm to guide our approach to ventilator weaning for patients with SCI

**(Figure 2)**. Specifically, our approach includes an evaluation of diaphragm atrophy (via muscle thickness) as well as contractility (as measured by the TR) during initial evaluation for patients with SCI who are ventilator-dependent on admission.

Patients who demonstrate normal contractility of the diaphragm and no significant atrophy are deemed to be good candidates for eventual ventilator weaning, even when other traditional markers for readiness to wean, such as vital capacity or negative inspiratory force, are not indicative of successful weaning at the time of evaluation. For those with present but impaired contractility of the diaphragm, it is felt they may eventually be able to achieve some degree of ventilator-free breathing but likely require further optimization including expiratory muscle strength training and cardiopulmonary rehabilitation strategies. For those patients, a cautious approach to ventilator weaning is adopted.

For patients with significantly impaired or absent diaphragm contractility, diaphragm atrophy becomes an important clinical feature (**Figure 3**). In general, an upper motor neuron injury that occurs above the anterior horn of the spinal cord results in impaired contractility of a muscle with minimal muscle atrophy in the subacute period when patients with new SCI are admitted for inpatient rehabilitation. By contrast, lower motor neuron injuries occur as a result of damage to the anterior horn cell, the nerve root, or the peripheral nerve. A lower motor neuron pattern of injury often results in severe muscle atrophy in the subacute period due to denervation of the muscle.<sup>16</sup> A SCI with a purely upper motor neuron pattern of injury results in diaphragm muscle weakness without significant atrophy. If the mechanism of injury to the spinal cord includes

damage of the anterior horn cells or nerve roots at the C3-5 level, a lower motor neuron injury can occur with resulting significant atrophy of the diaphragm muscle due to this denervation.

Patients who demonstrate absent contractility but normal thickness of the diaphragm (i.e. no atrophy) are identified as potential candidates for diaphragm muscle pacing, which involves implantation of electrodes to either the phrenic nerves at the neck or at the phrenic motor points within the diaphragm muscle itself. Both techniques require intact phrenic nerves, and denervation of the diaphragm is a contraindication. The benefits of diaphragm muscle pacing are numerous, and include achievement of partial or complete ventilator free breathing, improved mobility and ease of transfers, restoration of olfaction, improved speech, improved comfort, and reduction in pulmonary infections.<sup>17-20</sup> At our center, a thoracic surgery team performs this evaluation and implantation of the pacer system.

Findings of lack of contractility of the diaphragm in conjunction with significant atrophy are indicative of denervation atrophy and axonal loss. In these cases, diaphragm pacing is not indicated. Other surgical interventions, such as nerve transfers, may be a possibility, and were recently considered in a prospective case series by Kaufman and colleagues.<sup>21</sup> Additional studies are needed to further investigate the role of surgical interventions to achieve ventilator-free breathing after spinal cord injury.

Limitations of our study include the retrospective study design and the single center setting. Though our sample size is relatively small, the patient population in question (ventilator-

dependent patients with SCI) is itself small in size, and our study represents a unique case series investigating the use of diaphragm ultrasound in this patient population.

Our data suggests that diaphragm ultrasound is a highly promising tool in prognosticating the ability to wean from a ventilator after cervical SCI. Future prospective studies are needed to better assess the impact of diaphragm muscle ultrasound as a tool to predict ventilator weaning outcomes.

## **5. Acknowledgements**

CKF would like to acknowledge support from the Belle Carnell Regenerative Neurorehabilitation Fund. SK would like to acknowledge support from the Catalyst Grant Program at Shirley Ryan AbilityLab. The authors acknowledge Dom D'Andrea for artwork used in Figure 3. The authors declare that this research was conducted in the absence of any commercial or financial relationships that could be construed as a potential conflict of interest.



## 6. References

1. DeVivo MJ, Krause JS, Lammertse DP. Recent trends in mortality and causes of death among persons with spinal cord injury. *Arch Phys Med Rehabil.* 1999;80:1411–1419.
2. Krause JS, DeVivo MJ, Jackson AB. Health status, community integration, and economic risk factors for mortality after spinal cord injury. *Arch Phys Med Rehabil.* 2004;85:1764–1773.
3. Shavelle RM, DeVivo MJ, Strauss DJ, Paculdo DR, Lammertse DP, Day SM. Long-term survival of persons ventilator dependent after spinal cord injury. *J Spinal Cord Med.* 2006;29(5):511-9. doi: 10.1080/10790268.2006.11753901. PMID: 17274490; PMCID: PMC1949034.
4. Charlifue S, Apple D, Burns SP, Chen D, Cuthbert JP, Donovan WH, Lammertse DP, Meade MA, Pretz CR. Mechanical ventilation, health, and quality of life following spinal cord injury. *Arch Phys Med Rehabil.* 2011 Mar;92(3):457-63. doi: 10.1016/j.apmr.2010.07.237. Erratum in: *Arch Phys Med Rehabil.* 2012 Mar;93(3):550. PMID: 21353827.
5. Respiratory management in the patient with SCI; <https://www.ncbi.nlm.nih.gov.ezproxy.galter.northwestern.edu/pmc/articles/PMC3781830/>
6. Oliver KA, Ashurst JV. Anatomy, Thorax, Phrenic Nerves. [Updated 2022 Jul 25]. In: StatPearls [Internet]. Treasure Island (FL): StatPearls Publishing; 2022 Jan-. Available from: <https://www.ncbi.nlm.nih.gov/books/NBK513325/>
7. Wicks AB, Menter RR. Long-term outlook in quadriplegic patients with initial ventilator dependency. *Chest.* 1986 Sep;90(3):406-10. doi: 10.1378/chest.90.3.406. PMID: 3743155.

8. Oo T, Watt JMW, Soni BM, Sett PK. Delayed diaphragm recovery in 12 patients after high cervical spinal cord injury. A retrospective review of the diaphragm status of 107 patients ventilated after acute spinal cord injury. *Spinal Cord*. 1999;37:117–122.
9. Chiodo AE, Scelza W, Forchheimer M. Predictors of ventilator weaning in individuals with high cervical spinal cord injury. *J Spinal Cord Med*. 2008;31(1):72-7. doi: 10.1080/10790268.2008.11753984. PMID: 18533415; PMCID: PMC2435030.
10. Boon AJ, Harper CJ, Ghahfarokhi LS, Strommen JA, Watson JC, Sorenson EJ. Two-dimensional ultrasound imaging of the diaphragm: quantitative values in normal subjects. *Muscle Nerve*. 2013 Jun;47(6):884-9. doi: 10.1002/mus.23702. Epub 2013 Apr 29. PMID: 23625789.
11. Boon AJ, Sekiguchi H, Harper CJ, Strommen JA, Ghahfarokhi LS, Watson JC, Sorenson EJ. Sensitivity and specificity of diagnostic ultrasound in the diagnosis of phrenic neuropathy. *Neurology*. 2014 Sep 30;83(14):1264-70. doi: 10.1212/WNL.0000000000000841. Epub 2014 Aug 27. PMID: 25165390; PMCID: PMC4180486.
12. Patel Z, Franz CK, Bharat A, Walter JM, Wolfe LF, Koralnik IJ, Deshmukh S. Diaphragm and Phrenic Nerve Ultrasound in COVID-19 Patients and Beyond: Imaging Technique, Findings, and Clinical Applications. *J Ultrasound Med*. 2022 Feb;41(2):285-299. doi: 10.1002/jum.15706. Epub 2021 Mar 27. PMID: 33772850; PMCID: PMC8250472.
13. Farr E, Wolfe AR, Deshmukh S, Rydberg L, Soriano R, Walter JM, Boon AJ, Wolfe LF, Franz CK. Diaphragm dysfunction in severe COVID-19 as determined by neuromuscular

- ultrasound. *Ann Clin Transl Neurol.* 2021 Aug;8(8):1745-1749. doi: 10.1002/acn3.51416. Epub 2021 Jul 11. PMID: 34247452; PMCID: PMC8351384.
14. Kirshblum, S., & Lin, V. W. (2018). *Spinal Cord Medicine, third edition.* Springer Publishing Company.
  15. Farr E, D'Andrea D, Franz CK. Phrenic Nerve Involvement in Neuralgic Amyotrophy (Parsonage-Turner Syndrome). *Sleep Med Clin.* 2020 Dec;15(4):539-543. doi: 10.1016/j.jsmc.2020.08.002. Epub 2020 Oct 5. PMID: 33131663.
  16. Gordon T, Mao J. Muscle atrophy and procedures for training after spinal cord injury. *Phys Ther.* 1994 Jan;74(1):50-60. doi: 10.1093/ptj/74.1.50. PMID: 8265728.
  17. Kaufman MR, Elkwood AI, Aboharb F, Cece J, Brown D, Rezzadeh K, Jarrahy R. Diaphragmatic reinnervation in ventilator-dependent patients with cervical spinal cord injury and concomitant phrenic nerve lesions using simultaneous nerve transfers and implantable neurostimulators. *J Reconstr Microsurg.* 2015 Jun;31(5):391-5. doi: 10.1055/s-0035-1549159. Epub 2015 Apr 13. PMID: 25868155.
  18. Dobelle WH, D'Angelo MS, Goetz BF, Kiefer DG, Lallier TJ, Lamb JI, Yazwinsky JS. 200 cases with a new breathing pacemaker dispel myths about diaphragm pacing. *ASAIO J.* 1994 Jul-Sep;40(3):M244-52. doi: 10.1097/00002480-199407000-00003. PMID: 8555519.
  19. Carter RE, Donovan WH, Halstead L, et al. Comparative study of electrophrenic nerve stimulation and mechanical ventilatory support in traumatic spinal cord injury. *Paraplegia.* 1987;25:86-91. doi:[10.1038/sc.1987.16](https://doi.org/10.1038/sc.1987.16)
  20. Wijkstra PJ, van der Aa H, Hofker HS, Curto F, Giacomini M, Stagni G, Dura Agullo MA, Curià Casanoves FX, Benito-Penalva J, Martinez-Barenys C, Vidal J. Diaphragm

Pacing in Patients with Spinal Cord Injury: A European Experience. *Respiration*. 2022;101(1):18-24. doi: 10.1159/000517401. Epub 2021 Jul 16. PMID: 34274930; PMCID: PMC8820415.

21. Kaufman MR, Bauer T, Campbell S, Rossi K, Elkwood A, Jarrahy R. Prospective analysis of a surgical algorithm to achieve ventilator weaning in cervical tetraplegia. *J Spinal Cord Med*. 2022 Jul;45(4):531-535. doi: 10.1080/10790268.2020.1829417. Epub 2020 Oct 15. PMID: 33054689; PMCID: PMC9246221.

## 7. Tables

**Table 1.** Demographic characteristics and weaning outcomes of patients undergoing diaphragm ultrasound evaluation, grouped by outcome.

| Patient # | Age/Sex | Neurologic Level | AIS | Thickening Ratio (Left) | Thickening Ratio (Right) | Outcome at DC |
|-----------|---------|------------------|-----|-------------------------|--------------------------|---------------|
| 1         | 70s/F   | C4               | A   | 1.4                     | 2.5                      | weaned        |
| 2         | 40s/M   | C4               | A   | 1.4                     | 1.1                      | weaned        |
| 3         | 60s/M   | C4               | A   | 1.5                     | 2                        | weaned        |
| 4         | 30s/M   | C4               | A   | 1.4                     | 1                        | weaned        |
| 5         | 20s/M   | C4               | C   | 1.2                     | 1.1                      | weaned        |
| 6         | 60s/M   | C5               | A   | 1.4                     | 1.2                      | weaned        |
| 7         | 60s/M   | C4               | A   | 1.2                     | 1.4                      | weaned        |
| 8         | 20s/M   | C5               | A   | 1.5                     | 2                        | weaned        |
| 9         | 40s/M   | C2               | A   | 1.3                     | 1.3                      | weaned        |
| 10        | 20s/M   | C5               | B   | 1.7                     | 1.3                      | weaned        |
| 11        | 20s/M   | C2               | A   | 1.7                     | 1.5                      | weaned        |
| 12        | <20/M   | C1               | A   | 1                       | 1.8                      | no wean       |
| 13        | 30s/F   | C2               | A   | 1                       | 1                        | no wean       |
| 14        | 30s/M   | C1               | C   | 1                       | 1                        | no wean       |
| 15        | 50s/M   | C4               | A   | 1                       | 1                        | no wean       |
| 16        | 70s/M   | C1               | C   | 1.1                     | 1.1                      | no wean       |
| 17        | 50s/M   | C2               | C   | 1                       | 1                        | no wean       |
| 18        | 60s/M   | C2               | A   | 1                       | 1                        | no wean       |
| 19        | 60s/M   | C3               | A   | 1                       | 1                        | no wean       |
| 20        | <20/M   | C1               | A   | 1                       | 1                        | no wean       |
| 21        | <20/M   | C2               | B   | 1                       | 1                        | no wean       |

**Table 2.** Mean and medial diaphragm thickening ratios, calculated using each patient's maximum hemidiaphragm thickening ratio if patient had asymmetrical diaphragm function

|                  | <b>Successful Wean</b> | <b>No Wean</b> |
|------------------|------------------------|----------------|
| <b>n</b>         | 11                     | 10             |
| <b>Mean TR</b>   | 1.6                    | 1.1            |
| <b>Median TR</b> | 1.4                    | 1.0            |

**Table 3.** Ventilator weaning success and diaphragm thickening ratio

|                         | <b>Successful Wean<br/>(n=11)</b> |                              | <b>No Wean<br/>(n=10)</b>    |                              |
|-------------------------|-----------------------------------|------------------------------|------------------------------|------------------------------|
| <b>Thickening Ratio</b> | <b><math>\geq 1.2</math></b>      | <b><math>&lt; 1.2</math></b> | <b><math>\geq 1.2</math></b> | <b><math>&lt; 1.2</math></b> |
| n                       | 11                                | 0                            | 1                            | 9                            |

## 8. Figures

**Figure 1.** Diaphragm ultrasound images showing the diaphragm muscle thickening that occurs during inspiration and diaphragm contraction. (A) Ultrasound image of the diaphragm illustrating the thickness of the diaphragm (red bracket) at TLC, or inhalation. Asterisk, ribs. Arrow, pleural line. Arrow head, peritoneal line. (B) Ultrasound image of the diaphragm illustrating the thickness of the diaphragm (red bracket) at FRC. The thickening ratio is calculated as  $TR = \text{thickness at TLC} / \text{thickness at FRC}$ .

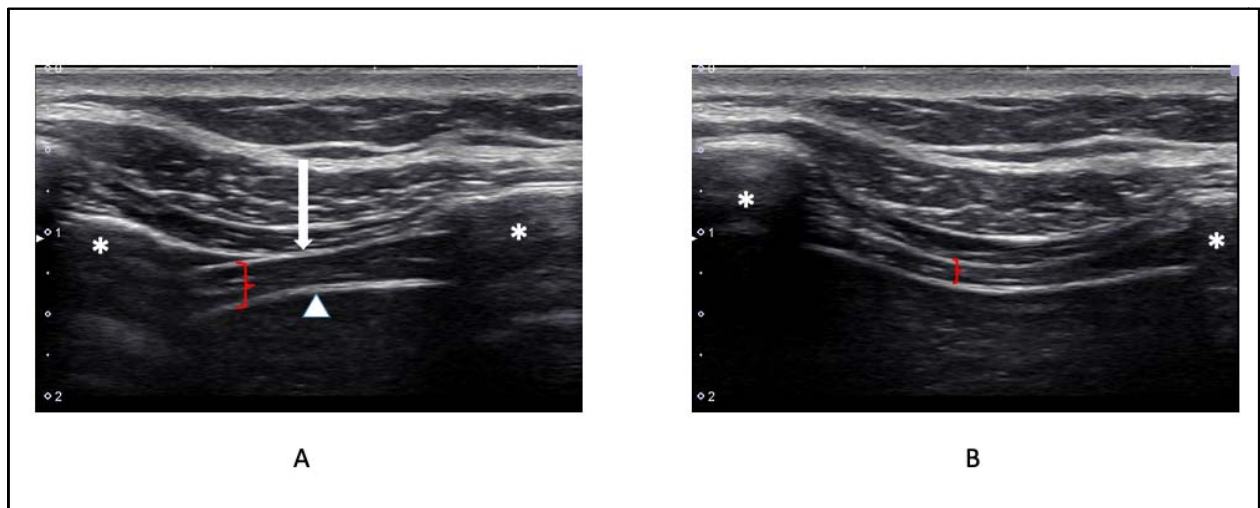



**Figure 2.** Clinical algorithm for ventilator weaning based on measurements of contractility and muscle thickness on diaphragm muscle ultrasound evaluation.

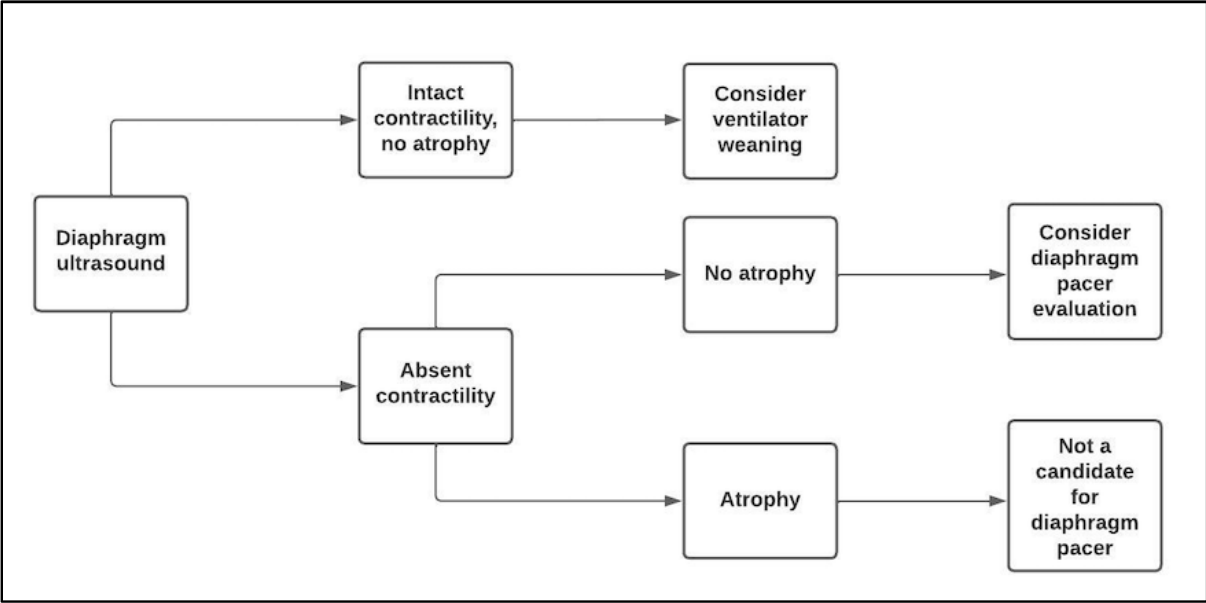

**Figure 3.** Illustration of upper vs lower motor neuron injury patterns at the C3 level of the spinal cord and peripheral nerve root. (A) Intact spinal cord and peripheral nerve, associated with a diaphragm with normal thickness. (B) Pure upper motor neuron spinal cord injury, which can result in impaired contractility of the diaphragm, but is associated with normal diaphragm thickness. (C) Lower motor neuron injury which can be associated with severe diaphragm atrophy due to axonal loss and denervation changes. (D) A mixed upper and lower motor neuron injury can result in severe diaphragm atrophy.

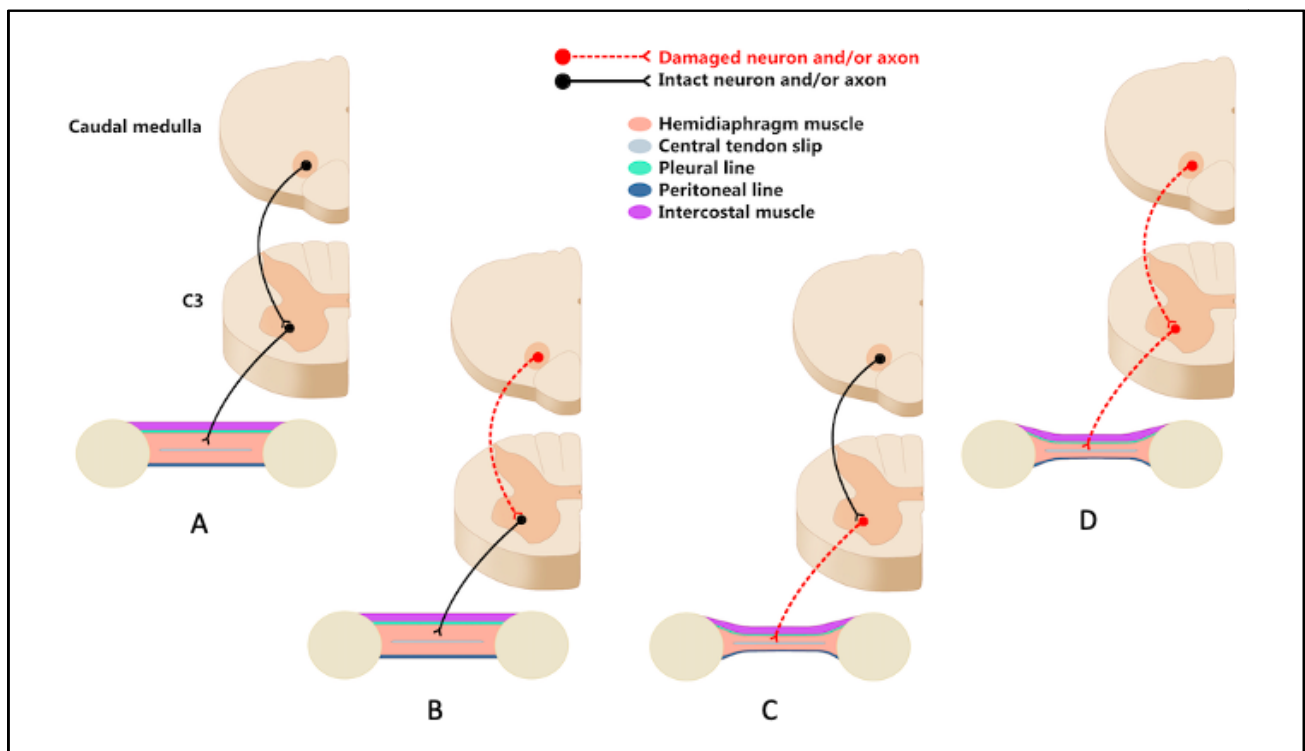

Source: https://medrxiv.org/content/10.1101/2024.02.28.24303260v1.full.pdf
