1           **The Predictive Value of Diaphragm Muscle Ultrasound for**  
2           **Ventilator Weaning Outcomes after Cervical Spinal Cord Injury:**  
3                           **A Retrospective Case Series**

4  
5   **Natasha S. Bhatia, MD<sup>1,2</sup>, Stephany Kunzweiler, PT, DPT<sup>1</sup>, Christopher Conley, RT<sup>1</sup>, Ki H.**  
6   **Kim, MD<sup>1,2</sup>, Adenike A. Adewuyi, MD, PhD<sup>1,2,4</sup>, Antonio Mondriguez-Gonzalez, MD<sup>1</sup>, Lisa**  
7   **F. Wolfe, MD<sup>1,3,4</sup>, Mary Kwasny, ScD<sup>5</sup>, Colin K. Franz, MD, PhD<sup>1,2,4\*</sup>**

8  
9   <sup>1</sup>Shirley Ryan AbilityLab, Chicago, IL, USA

10   <sup>2</sup>Department of Physical Medicine and Rehabilitation, Northwestern University Feinberg School  
11   of Medicine, Chicago, IL, USA

12   <sup>3</sup>Division of Pulmonary and Critical Care Medicine, Department of Medicine, Northwestern  
13   University Feinberg School of Medicine. Chicago, IL, USA

14   <sup>4</sup>Ken and Ruth Davee Department of Neurology, Northwestern University Feinberg School of  
15   Medicine, Chicago, IL, USA

16   <sup>5</sup>Department of Preventive Medicine, Northwestern University Feinberg School of Medicine,  
17   Chicago, IL, USA

18  
19   Short Running Title: Diaphragm Ultrasound and SCI Ventilator Weaning Outcomes

20   Manuscript Category: Original Article

23 \*Correspondence:

24 Colin K. Franz, MD, PhD

25 Physician/Scientist

26

27 355 E. Erie St, Chicago, IL 60611

28 312-238-1000

29 cfranz@sralab.org

30 **Abstract**

31 Objectives

32 Neuromuscular respiratory failure after cervical spinal cord injury (cSCI) can lead to dependence  
33 on an invasive mechanical ventilator. Ventilator-free breathing after cSCI is associated with  
34 improved morbidity, mortality, and quality of life. We investigated the use of diaphragm muscle  
35 ultrasound to predict ventilator weaning outcomes after cSCI.

36

37 Methods

38 This is a retrospective case series conducted at a university-affiliated freestanding inpatient  
39 rehabilitation facility. We identified patients with cSCI who had a tracheostomy and were  
40 dependent on an invasive mechanical ventilator at the time of admission to inpatient  
41 rehabilitation. A diaphragm muscle ultrasound was performed, which included measurements of  
42 the thickness of the diaphragm and a calculation of the thickening ratio (TR), which reflects  
43 diaphragm muscle contraction. The primary outcome measure was the need for mechanical  
44 ventilation at time of discharge from the inpatient rehabilitation facility. Successful ventilator  
45 weaning was defined as either daytime or full 24-hour ventilator-free breathing.

46

47 Results

48 Of the 21 patients enrolled, 11 (52%) were able to wean successfully (partially or fully) from the  
49 ventilator. Of the ultrasound measurements that were taken, the TR was the optimal predictor for  
50 ventilator weaning outcomes. A threshold of  $TR \geq 1.2$  as the maximum hemidiaphragm  
51 measurement had a sensitivity of 1.0 and specificity of 0.90 for predicting ventilator weaning.

52

53 Conclusion

54 Normal diaphragm contractility ( $TR \geq 1.2$ ) as determined by diaphragm muscle ultrasound is a

55 strong positive predictor for successful ventilator weaning in patients with cSCI.

56 Utilizing diaphragm ultrasound, rehabilitation physicians can set precision rehabilitation goals

57 regarding ventilator weaning for inpatients with respiratory failure after cSCI, potentially

58 improving both outcomes and quality of life.

59

60 Keywords: diaphragm muscle, neuromuscular, ultrasound, ventilator weaning, spinal cord injury

61

62

63 **1. Introduction**

64 Dependence on a ventilator after cervical spinal cord injury (cSCI) has important implications  
65 for morbidity, mortality, and quality of life. People with cSCI who rely on mechanical  
66 ventilation are almost 40 times more likely to die during the first year after injury compared to  
67 those who are not ventilator-dependent,<sup>1</sup> and long-term mortality rates remain up to 3.5 times  
68 higher for those who require mechanical ventilation after the first year of injury.<sup>1,2</sup> This excess  
69 mortality is predominantly a result of respiratory disorders, and the most common causes of  
70 death for ventilator-dependent people with SCI are pneumonia and other respiratory  
71 complications.<sup>3</sup> People with SCI who are ventilator-dependent report a more negative perception  
72 of their health status, lower social integration scores, and worse quality of life outcomes  
73 compared to people living with SCI who do not require a ventilator.<sup>4</sup>

74  
75 Respiratory failure after spinal cord injury is a result of dysfunction of both ventilation and  
76 airway clearance.<sup>5</sup> The neurologic level of injury (NLI) after cSCI is a critical factor in the need  
77 for mechanical ventilation. The primary muscle of inspiration, the diaphragm, is innervated by  
78 the phrenic nerve which originates from the C3, C4, and C5 nerve roots, with C4 providing  
79 primary innervation.<sup>6</sup> Patients with a neurologically complete SCI at the C1-2 levels are typically  
80 not able to achieve ventilator-free breathing, though some studies have shown the possibility of  
81 weaning in rare cases.<sup>7</sup> For those with a NLI at C3, ventilator-free breathing rates vary from 25-  
82 50%.<sup>7,8</sup> For those with NLI at C4, up to 70-80% of patients can successfully wean from the  
83 ventilator, and an even higher percentage achieve ventilator-free breathing with a NLI at C5-6  
84 and below.<sup>7-9</sup> This variability even within each neurologic level illustrates the need for additional

85 clinical tools to both determine readiness for ventilator weaning and serve as an accurate  
86 predictor for successful ventilator-free breathing outcomes.

87

88 Current clinical tools used to predict successful ventilator-free breathing include bedside  
89 spirometry and respiratory function parameters (such as vital capacity and negative inspiratory  
90 force), fluoroscopic evaluation of the diaphragm, phrenic nerve conduction studies (NCS), and  
91 needle electromyography (EMG) of the diaphragm muscle.<sup>9</sup> While bedside spirometry and  
92 fluoroscopic evaluation of the diaphragm are non-invasive methods to diagnose diaphragm  
93 dysfunction, they are less sensitive than other techniques.<sup>9</sup> Conversely, while needle EMG and  
94 phrenic NCS are sensitive tests for diaphragm dysfunction, these methods are more invasive and  
95 require a highly skilled practitioner to perform the procedures and interpret the results.  
96 Moreover, needle EMG of the diaphragm can be associated with risk of diaphragm injury and  
97 pneumothorax, while phrenic NCS has a high false positive rate associated with lack of response  
98 on NCS despite intact diaphragm muscle innervation.<sup>10</sup>

99

100 Ultrasound of the diaphragm muscle has been used to evaluate diaphragm function and  
101 contractility in the context of a variety of disorders including phrenic nerve injury, direct  
102 diaphragm injury, lung transplantation, and more recently, respiratory dysfunction after COVID-  
103 19 infection.<sup>11,12</sup> Prior work from Boon and colleagues has reported a 93% sensitivity and 100%  
104 specificity of this mode of diaphragm ultrasound in identifying neuromuscular diaphragm  
105 dysfunction from phrenic neuropathy.<sup>11</sup>

106

107 The purpose of this study was to investigate the efficacy of diaphragm muscle ultrasound to  
108 predict ventilator weaning outcomes after cSCI in patients dependent on mechanical ventilation.

109

## 110 2. Materials and Methods

111 This study is a retrospective case series via chart review of data obtained as part of routine  
112 patient care where the sonographer was not blinded to the patient's diagnosis. Northwestern  
113 University's Institutional Review Board (IRB) approved the study (STU23625789). This  
114 included a waiver of informed consent, justified by the minimal risk to subjects and the  
115 impracticality of obtaining consent for this review. The IRB's approval ensured compliance with  
116 ethical principles, including patient privacy and data confidentiality, in line with the Declaration  
117 of Helsinki.

118

119 This study was conducted at a university-affiliated freestanding acute rehabilitation hospital. We  
120 identified patients with cSCI who had a tracheostomy and were dependent on invasive  
121 mechanical ventilation for any number of hours at the time of admission to the rehabilitation  
122 unit, and who were referred for a neuromuscular diaphragm ultrasound. As part of our  
123 institution's interdisciplinary ventilator liberation program, all patients with cSCI on a ventilator  
124 who have a goal of potential ventilator weaning are referred for a diaphragm ultrasound  
125 evaluation. We collected demographic and clinical data including time from injury, American  
126 Spinal Injury Association (ASIA) Impairment Scale (AIS) neurologic level of injury and  
127 completeness of injury, and number of hours per day spent on the ventilator.

128

129 A practicing physician (CKF) board certified in both Physical Medicine and Rehabilitation and  
130 Neuromuscular Medicine (American Board of Physical Medicine and Rehabilitation), and who  
131 holds the Neuromuscular Ultrasound Certificate of Added Qualification (American Board of

132 Electrodiagnostic Medicine), performed the diaphragm muscle ultrasound examinations. This  
133 study followed a protocol for diaphragm ultrasound evaluation as previously published by Farr et  
134 al, based on Boon's original study, since it corresponds to the normative data set, and was taken  
135 from a similar population of healthy controls within the same geographic area as our study  
136 population.<sup>10,13</sup> Typically, the sonographic evaluation includes a B-mode examination of each  
137 hemidiaphragm, with measurements of the thickness of the hemidiaphragm muscle both at  
138 maximal inspiration (i.e. total lung capacity, TLC) and at end expiration (i.e. functional residual  
139 capacity, FRC).<sup>11</sup> At FRC in the zone of apposition, a diaphragm thickness of  $\geq 0.15$ cm is  
140 considered normal, with a thickness less than this cutoff consistent with diaphragm atrophy.<sup>10</sup>  
141 From these two measurements of diaphragm size, a thickening ratio (TR) can be calculated,  
142 where  $TR = \text{thickness at TLC} / \text{thickness at FRC}$  (**Figure 1**). The TR reflects diaphragm muscle  
143 contractility, with a normal  $TR \geq 1.2$ .<sup>10</sup> Our sonographic evaluation included examination of each  
144 hemidiaphragm using a low intercostal approach (8<sup>th</sup> or 9<sup>th</sup> intercostal space) along the anterior  
145 axillary line (**Figure 2**). The ultrasound evaluation included measurements of the thickness of  
146 each hemidiaphragm at maximal inhalation (or TLC) and exhalation (or FRC), as well as a  
147 calculation of the TR as a marker of diaphragm contractility. These measures are taken  
148 bilaterally (one measure for each hemidiaphragm). In general, patients with only one paretic  
149 hemi-diaphragm are not expected to be completely ventilator dependent.<sup>14</sup> As such, we preferred  
150 to use the maximum measurement of the two sides to determine if this function may predict the  
151 ability to wean from the ventilator.

152  
153 After sonographic evaluation, the medical team performed a clinical assessment of respiratory  
154 parameters (including vital capacity, negative inspiratory force, resting tidal volume, and



155 CO<sub>2</sub>/arterial blood gas results) to determine readiness for ventilator weaning. Once these  
156 respiratory parameters fall within safe guidelines, the ventilator weaning process follows a  
157 progressive ventilator free breathing protocol, where patients spend progressively increasing  
158 intervals of time off the ventilator each day, and which is the most successful method of  
159 ventilator weaning for people with SCI (see **Supplemental File 1**).<sup>15</sup>

160  
161 The primary outcome measure was the need for mechanical ventilation at the time of discharge  
162 from acute inpatient rehabilitation. The outcomes of patients in our data set could be grouped  
163 into two categories: no meaningful ventilator weaning (off ventilator for <1 hour per day), and  
164 successful ventilator weaning (including both daytime ventilator-free breathing with nocturnal  
165 use of the ventilator, and full ventilator weaning). Because daytime ventilator-free breathing is  
166 associated with improved outcomes and quality of life, analysis was performed by categorizing  
167 patients as either successfully weaned from the ventilator (full or daytime) or not weaned.  
168 Logistic regression models were fit, and the area under the receiver operating characteristic curve  
169 was used to determine the best predictor of successful (full or partial) weaning. Sensitivity and  
170 specificity were then calculated.

171

### 172 **3. Results**

173 This retrospective case series followed 21 patients who were screened by ultrasound for their  
174 candidacy for ventilator weaning during their inpatient rehabilitation admission (**Table 1**). There  
175 were 19 male and 2 female patients, with an average age of 44 years (range = 17-78 years). All  
176 patients sustained a traumatic cSCI, ranging from C1-C5 neurologic level of injury, and AIS A-C

177 completeness. All patients required mechanical ventilation via tracheostomy at the time of  
178 admission to acute inpatient rehabilitation.

179  
180 At time of discharge, 11 patients (52%) achieved successful (full or daytime) ventilator-free  
181 breathing, while 10 patients did not achieve meaningful ventilator-free breathing. The mean TR  
182 calculated from the best hemidiaphragm measurement for patients who achieved ventilator-free  
183 breathing was 1.6, while the mean TR for patients who did not achieve ventilator weaning was  
184 1.1 (**Table 2**). Median TR was also calculated for both groups given outlier data within the data  
185 set. The successfully weaned group had a median TR of 1.4, and the unsuccessfully weaned  
186 group had a median TR of 1.0 (**Table 2**). Using a cutoff of  $TR \geq 1.2$  resulted in 100% sensitivity  
187 and 90% specificity for predicting successful ventilator weaning (**Table 3**).

188  
189 Within our study population, all 11 patients who achieved successful ventilator weaning had a  
190 maximum TR of 1.2 or greater (**Table 3**), and 8 of those patients (72%) in this group had normal  
191 TRs bilaterally. Of the 10 patients who did not wean from the ventilator, 9 had impaired or  
192 absent contractility bilaterally, and only one patient had a normal maximum TR (patient #12),  
193 though did have their rehabilitation course complicated by recurrent pneumonia.

194  
195 The receiver operating characteristic curve was plotted with an area under the curve of 0.95,  
196 which indicates a high overall performance of the best thickening ratio as a diagnostic test for  
197 successful ventilator weaning at the chosen cutoff of 1.2. The sensitivity at this cutoff was 100%,  
198 indicating that all successful weaning cases were correctly identified using this cutoff. The  
199 specificity was 90%, indicating that 90% of the failures were correctly identified as such when

200 using the cutoff of 1.2. A high sensitivity and specificity suggest that a cutoff of 1.2 for the best  
201 thickening ratio is a good threshold for predicting successful ventilator weaning.

202

#### 203 **4. Discussion**

204 The use of diaphragm ultrasound provides valuable information about the diaphragm muscle's  
205 innervation status,<sup>16</sup> which is especially important in the case of patients with C3 or C4 level  
206 injuries where diaphragm dysfunction may be a consequence of mixed upper and lower motor  
207 neuron lesions, so retained partial innervation cannot be assumed, and ventilator weaning  
208 outcomes are variable. The inability to accurately predict short- and long-term ventilator needs  
209 interferes with delivering optimal care for patients after cSCI.

210

211 Our findings demonstrate that a normal thickening ratio as determined by diaphragm ultrasound  
212 evaluation is a strong predictor of successful ventilator-free breathing. Evidence of intact  
213 contractility on ultrasound can indicate weaning potential for patients who would typically not be  
214 expected to wean from the ventilator based on their injury levels. In our study, for example, two  
215 patients with C2 AIS A injuries were found to have intact contractility bilaterally and were both  
216 able to successfully wean from the ventilator. Conversely, evidence of abnormal diaphragm  
217 contractility can also indicate the need for caution with ventilator weaning attempts. Two  
218 patients who would be expected to retain some degree of diaphragm innervation given their  
219 injury level (C3 and C4 levels of injury) both displayed absent contractility bilaterally and were  
220 ultimately unable to wean from the ventilator.

221

222 For patients unable to fully wean from the ventilator at time of discharge from acute care,  
223 options for ongoing rehabilitation are often limited. Many acute inpatient rehabilitation facilities  
224 cannot accept patients requiring mechanical ventilation due to inadequate staffing. In these cases,  
225 patients who require mechanical ventilation at time of discharge from acute care are sent to long-  
226 term acute care facilities to attempt to wean off the ventilator prior to admission to an inpatient  
227 rehabilitation unit. This results in a delay in intensive rehabilitation therapies, which are critical  
228 in the early stages of recovery from SCI. Acute inpatient rehabilitation facilities that can manage  
229 patients on a ventilator are thus uniquely able to both provide intensive rehabilitation therapies  
230 and potentially work towards ventilator weaning. Clinical tools that can help better identify  
231 which patients may be able wean from a ventilator successfully can help guide clinical practice  
232 and rehabilitation goal setting.

233  
234 Within our treatment center, the application of our findings has contributed to the development  
235 of a treatment algorithm to guide our approach to ventilator weaning for patients with SCI  
236 (**Figure 3**). Specifically, our approach includes an evaluation of diaphragm atrophy and  
237 contractility during initial evaluation for patients with cSCI who are ventilator-dependent on  
238 admission.

239  
240 Patients who demonstrate normal contractility of the diaphragm and no significant atrophy are  
241 deemed to be good candidates for eventual ventilator weaning, even when other traditional  
242 markers for readiness to wean, such as vital capacity or negative inspiratory force, are not  
243 indicative of successful weaning at the time of evaluation. For those with present but impaired  
244 contractility of the diaphragm, it is felt they may eventually be able to achieve some degree of

245 ventilator-free breathing but likely require further optimization including respiratory muscle  
246 strength training and cardiopulmonary rehabilitation strategies. For those patients, a cautious  
247 approach to ventilator weaning is adopted with a focus on cardiopulmonary optimization.

248  
249 For patients with significantly impaired or absent diaphragm contractility, diaphragm atrophy  
250 becomes an important clinical feature (**Figure 4**). In general, an upper motor neuron injury that  
251 occurs above the anterior horn of the spinal cord results in impaired contractility of a muscle  
252 with minimal muscle atrophy in the subacute period when patients with new cSCI are admitted  
253 for inpatient rehabilitation. By contrast, lower motor neuron injuries occur due to damage to the  
254 anterior horn cell, the nerve root, or the peripheral nerve, and often result in severe muscle  
255 atrophy in the subacute period due to muscle denervation.<sup>17</sup>

256  
257 Patients who demonstrate absent contractility but normal thickness of the diaphragm (i.e. no  
258 atrophy) are identified as potential candidates for diaphragm muscle pacing, which involves  
259 implantation of electrodes to either the phrenic nerves at the neck or at the phrenic motor points  
260 within the diaphragm muscle itself. Both techniques require intact phrenic nerves, and  
261 denervation of the diaphragm is a contraindication. The benefits of diaphragm muscle pacing  
262 include partial or complete ventilator-free breathing, reduction in pulmonary infections, and  
263 improved comfort and speech production.<sup>18-21</sup> At our center, a thoracic surgery team performs  
264 this evaluation and implantation of the pacer system.

265  
266 Findings of lack of diaphragm contractility in conjunction with significant atrophy indicate  
267 denervation atrophy and axonal loss. In these cases, diaphragm pacing is not indicated. Other

268 surgical interventions, such as nerve transfers, may be a possibility, and were recently considered  
269 in a prospective case series by Kaufman and colleagues.<sup>22</sup> Additional studies are needed to  
270 further investigate the role of surgical interventions in achieving ventilator-free breathing after  
271 cSCI.

272  
273 Limitations of our study include the retrospective study design and the single center setting.  
274 Though our sample size is relatively small, the patient population in question (ventilator-  
275 dependent patients with cSCI) is itself small in size, and our study represents a unique case series  
276 investigating the use of diaphragm ultrasound in this patient population.

277  
278 Our data suggests that diaphragm ultrasound is a highly promising tool in prognosticating the  
279 ability to wean from a ventilator after cSCI. Future prospective studies are needed to better  
280 assess the impact of diaphragm muscle ultrasound as a tool to predict ventilator weaning  
281 outcomes.

282 **5. Acknowledgements**

283 CKF would like to acknowledge support from the Belle Carnell Regenerative  
284 Neurorehabilitation Fund. SK would like to acknowledge support from the Catalyst Grant  
285 Program at Shirley Ryan AbilityLab. The authors acknowledge Dom D’Andrea for artwork used  
286 in Figure 4. The authors declare that this research was conducted in the absence of any  
287 commercial or financial relationships that could be construed as a potential conflict of interest.

## 6. References

1. DeVivo MJ, Krause JS, Lammertse DP. Recent trends in mortality and causes of death among persons with spinal cord injury. *Arch Phys Med Rehabil*. 1999;80:1411–1419.
2. Krause JS, DeVivo MJ, Jackson AB. Health status, community integration, and economic risk factors for mortality after spinal cord injury. *Arch Phys Med Rehabil*. 2004;85:1764–1773.
3. Shavelle RM, DeVivo MJ, Strauss DJ, Paculdo DR, Lammertse DP, Day SM. Long-term survival of persons ventilator dependent after spinal cord injury. *J Spinal Cord Med*. 2006;29(5):511-9. doi: 10.1080/10790268.2006.11753901. PMID: 17274490; PMCID: PMC1949034.
4. Charlifue S, Apple D, Burns SP, Chen D, Cuthbert JP, Donovan WH, Lammertse DP, Meade MA, Pretz CR. Mechanical ventilation, health, and quality of life following spinal cord injury. *Arch Phys Med Rehabil*. 2011 Mar;92(3):457-63. doi: 10.1016/j.apmr.2010.07.237. Erratum in: *Arch Phys Med Rehabil*. 2012 Mar;93(3):550. PMID: 21353827.
5. Respiratory management in the patient with SCI; <https://www.ncbi.nlm.nih.gov.ezproxy.galter.northwestern.edu/pmc/articles/PMC3781830/>
6. Oliver KA, Ashurst JV. Anatomy, Thorax, Phrenic Nerves. [Updated 2022 Jul 25]. In: StatPearls [Internet]. Treasure Island (FL): StatPearls Publishing; 2022 Jan-. Available from: <https://www.ncbi.nlm.nih.gov/books/NBK513325/>
7. Wicks AB, Menter RR. Long-term outlook in quadriplegic patients with initial ventilator dependency. *Chest*. 1986 Sep;90(3):406-10. doi: 10.1378/chest.90.3.406. PMID: 3743155.



8. Oo T, Watt JMW, Soni BM, Sett PK. Delayed diaphragm recovery in 12 patients after high cervical spinal cord injury. A retrospective review of the diaphragm status of 107 patients ventilated after acute spinal cord injury. *Spinal Cord*. 1999;37:117–122.
9. Chiodo AE, Scelza W, Forchheimer M. Predictors of ventilator weaning in individuals with high cervical spinal cord injury. *J Spinal Cord Med*. 2008;31(1):72-7. doi: 10.1080/10790268.2008.11753984. PMID: 18533415; PMCID: PMC2435030.
10. Boon AJ, Harper CJ, Ghahfarokhi LS, Strommen JA, Watson JC, Sorenson EJ. Two-dimensional ultrasound imaging of the diaphragm: quantitative values in normal subjects. *Muscle Nerve*. 2013 Jun;47(6):884-9. doi: 10.1002/mus.23702. Epub 2013 Apr 29. PMID: 23625789.
11. Boon AJ, Sekiguchi H, Harper CJ, Strommen JA, Ghahfarokhi LS, Watson JC, Sorenson EJ. Sensitivity and specificity of diagnostic ultrasound in the diagnosis of phrenic neuropathy. *Neurology*. 2014 Sep 30;83(14):1264-70. doi: 10.1212/WNL.0000000000000841. Epub 2014 Aug 27. PMID: 25165390; PMCID: PMC4180486.
12. Patel Z, Franz CK, Bharat A, Walter JM, Wolfe LF, Koralnik IJ, Deshmukh S. Diaphragm and Phrenic Nerve Ultrasound in COVID-19 Patients and Beyond: Imaging Technique, Findings, and Clinical Applications. *J Ultrasound Med*. 2022 Feb;41(2):285-299. doi: 10.1002/jum.15706. Epub 2021 Mar 27. PMID: 33772850; PMCID: PMC8250472.
13. Farr E, Wolfe AR, Deshmukh S, Rydberg L, Soriano R, Walter JM, Boon AJ, Wolfe LF, Franz CK. Diaphragm dysfunction in severe COVID-19 as determined by neuromuscular

- ultrasound. *Ann Clin Transl Neurol.* 2021 Aug;8(8):1745-1749. doi: 10.1002/acn3.51416. Epub 2021 Jul 11. PMID: 34247452; PMCID: PMC8351384.
14. McCool FD, Tzelepis GE. Dysfunction of the diaphragm. *N Engl J Med.* 2012 Mar 8;366(10):932-42. doi: 10.1056/NEJMra1007236. Erratum in: *N Engl J Med.* 2012 May 31;366(22):2138. PMID: 22397655.
15. Kirshblum, S., & Lin, V. W. (2018). *Spinal Cord Medicine, third edition.* Springer Publishing Company.
16. Farr E, D'Andrea D, Franz CK. Phrenic Nerve Involvement in Neuralgic Amyotrophy (Parsonage-Turner Syndrome). *Sleep Med Clin.* 2020 Dec;15(4):539-543. doi: 10.1016/j.jsmc.2020.08.002. Epub 2020 Oct 5. PMID: 33131663.
17. Gordon T, Mao J. Muscle atrophy and procedures for training after spinal cord injury. *Phys Ther.* 1994 Jan;74(1):50-60. doi: 10.1093/ptj/74.1.50. PMID: 8265728.
18. Kaufman MR, Elkwood AI, Aboharb F, Cece J, Brown D, Rezzadeh K, Jarrahy R. Diaphragmatic reinnervation in ventilator-dependent patients with cervical spinal cord injury and concomitant phrenic nerve lesions using simultaneous nerve transfers and implantable neurostimulators. *J Reconstr Microsurg.* 2015 Jun;31(5):391-5. doi: 10.1055/s-0035-1549159. Epub 2015 Apr 13. PMID: 25868155.
19. Dobelle WH, D'Angelo MS, Goetz BF, Kiefer DG, Lallier TJ, Lamb JI, Yazwinsky JS. 200 cases with a new breathing pacemaker dispel myths about diaphragm pacing. *ASAIO J.* 1994 Jul-Sep;40(3):M244-52. doi: 10.1097/00002480-199407000-00003. PMID: 8555519.

20. Carter RE, Donovan WH, Halstead L, et al. Comparative study of electrophrenic nerve stimulation and mechanical ventilatory support in traumatic spinal cord injury. *Paraplegia*. 1987;25:86–91. doi:[10.1038/sc.1987.16](https://doi.org/10.1038/sc.1987.16)
21. Wijkstra PJ, van der Aa H, Hofker HS, Curto F, Giacomini M, Stagni G, Dura Agullo MA, Curià Casanoves FX, Benito-Penalva J, Martinez-Barenys C, Vidal J. Diaphragm Pacing in Patients with Spinal Cord Injury: A European Experience. *Respiration*. 2022;101(1):18-24. doi: [10.1159/000517401](https://doi.org/10.1159/000517401). Epub 2021 Jul 16. PMID: 34274930; PMCID: PMC8820415.
22. Kaufman MR, Bauer T, Campbell S, Rossi K, Elkwood A, Jarrahy R. Prospective analysis of a surgical algorithm to achieve ventilator weaning in cervical tetraplegia. *J Spinal Cord Med*. 2022 Jul;45(4):531-535. doi: [10.1080/10790268.2020.1829417](https://doi.org/10.1080/10790268.2020.1829417). Epub 2020 Oct 15. PMID: 33054689; PMCID: PMC9246221.

## 7. Tables

**Table 1.** Demographic characteristics and weaning outcomes of patients undergoing diaphragm ultrasound evaluation, grouped by outcome.

| Patient # | Age/Sex | Neurologic Level | AIS | Thickening Ratio (Left) | Thickening Ratio (Right) | Time from Injury on Admission (Days) | Length of Weaning Process (Days) | Outcome at DC |
|-----------|---------|------------------|-----|-------------------------|--------------------------|--------------------------------------|----------------------------------|---------------|
| 1         | 70s/F   | C4               | A   | 1.4                     | 2.5                      | 25                                   | 10                               | weaned        |
| 2         | 40s/M   | C4               | A   | 1.4                     | 1.1                      | 25                                   | 11                               | weaned        |
| 3         | 60s/M   | C4               | A   | 1.5                     | 2                        | 10                                   | 90                               | weaned        |
| 4         | 30s/M   | C4               | A   | 1.4                     | 1                        | 22                                   | 18                               | weaned        |
| 5         | 20s/M   | C4               | C   | 1.2                     | 1.1                      | 46                                   | 32                               | weaned        |
| 6         | 60s/M   | C5               | A   | 1.4                     | 1.2                      | 40                                   | 27                               | weaned        |
| 7         | 60s/M   | C4               | A   | 1.2                     | 1.4                      | 36                                   | 51                               | weaned        |
| 8         | 20s/M   | C5               | A   | 1.5                     | 2                        | 60                                   | 10                               | weaned        |
| 9         | 40s/M   | C2               | A   | 1.3                     | 1.3                      | 35                                   | 64                               | weaned        |
| 10        | 20s/M   | C5               | B   | 1.7                     | 1.3                      | 41                                   | 17                               | weaned        |
| 11        | 20s/M   | C2               | A   | 1.7                     | 1.5                      | 30                                   | 93                               | weaned        |
| 12        | <20/M   | C1               | A   | 1                       | 1.8                      | 30                                   | no wean                          | no wean       |
| 13        | 30s/F   | C2               | A   | 1                       | 1                        | 20                                   | no wean                          | no wean       |
| 14        | 30s/M   | C1               | C   | 1                       | 1                        | 22                                   | no wean                          | no wean       |
| 15        | 50s/M   | C4               | A   | 1                       | 1                        | 124                                  | no wean                          | no wean       |
| 16        | 70s/M   | C1               | C   | 1.1                     | 1.1                      | 81                                   | no wean                          | no wean       |
| 17        | 50s/M   | C2               | C   | 1                       | 1                        | 36                                   | no wean                          | no wean       |
| 18        | 60s/M   | C2               | A   | 1                       | 1                        | 30                                   | no wean                          | no wean       |
| 19        | 60s/M   | C3               | A   | 1                       | 1                        | 103                                  | no wean                          | no wean       |
| 20        | <20/M   | C1               | A   | 1                       | 1                        | 32                                   | no wean                          | no wean       |
| 21        | <20/M   | C2               | B   | 1                       | 1                        | 59                                   | no wean                          | no wean       |

**Table 2.** Mean and median diaphragm thickening ratios, calculated using each patient's maximum hemidiaphragm thickening ratio if patient had asymmetrical diaphragm function

|                  | <b>Successful Wean</b> | <b>No Wean</b> |
|------------------|------------------------|----------------|
| <b>Mean TR</b>   | 1.6                    | 1.1            |
| <b>Median TR</b> | 1.4                    | 1.0            |

**Table 3.** Sensitivity, specificity, positive predictive value, and negative predictive value using a  $TR \geq 1.2$  to predict successful ventilator weaning

|                                         | <b>Successful Wean (n)</b> | <b>No Wean (n)</b> |            |
|-----------------------------------------|----------------------------|--------------------|------------|
| <b>Maximum <math>TR \geq 1.2</math></b> | 11                         | 1                  | PPV = 92%  |
| <b>Maximum <math>TR &lt; 1.2</math></b> | 0                          | 9                  | NPV = 100% |
|                                         | Sensitivity = 100%         | Specificity = 90%  |            |

## 8. Figures

**Figure 1.** Diaphragm ultrasound images showing the diaphragm muscle thickening that occurs during inspiration and diaphragm contraction. (A) Ultrasound image of the diaphragm illustrating the thickness of the diaphragm (red bracket) at TLC, or inhalation. Asterisk, ribs. Arrow, pleural line. Arrow head, peritoneal line. (B) Ultrasound image of the diaphragm illustrating the thickness of the diaphragm (red bracket) at FRC. The thickening ratio is calculated as  $TR = \text{thickness at TLC} / \text{thickness at FRC}$ .

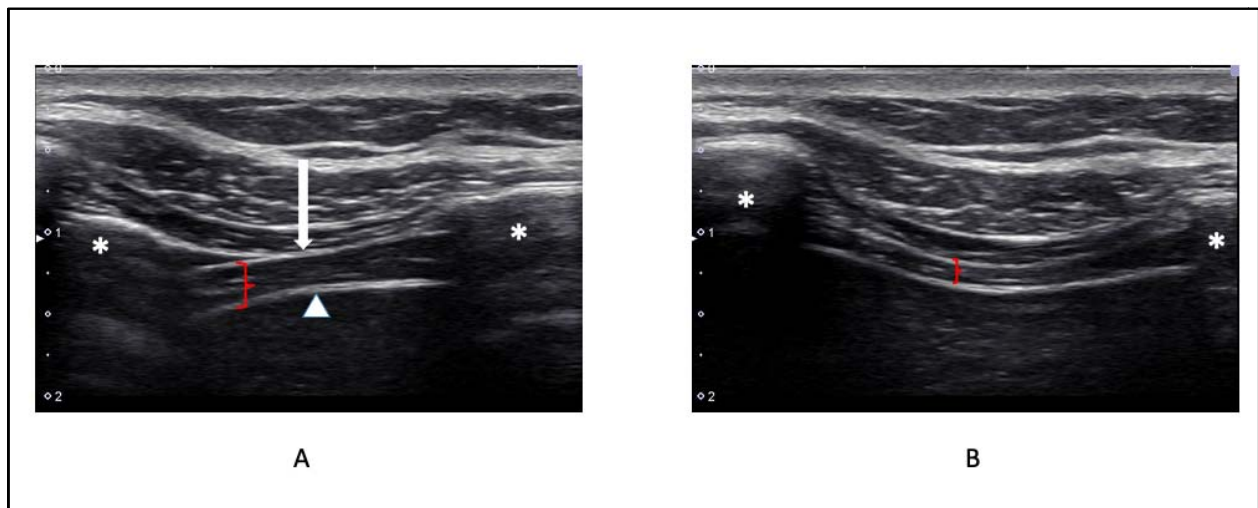

**Figure 2.** This figure demonstrates the positioning of an ultrasound transducer used in our protocol based on the technique described by Boon et al.<sup>10</sup> The transducer is placed on a lower intercostal space (8th or 9th) along the anterior axillary line. *Figure created with BioRender.com.*

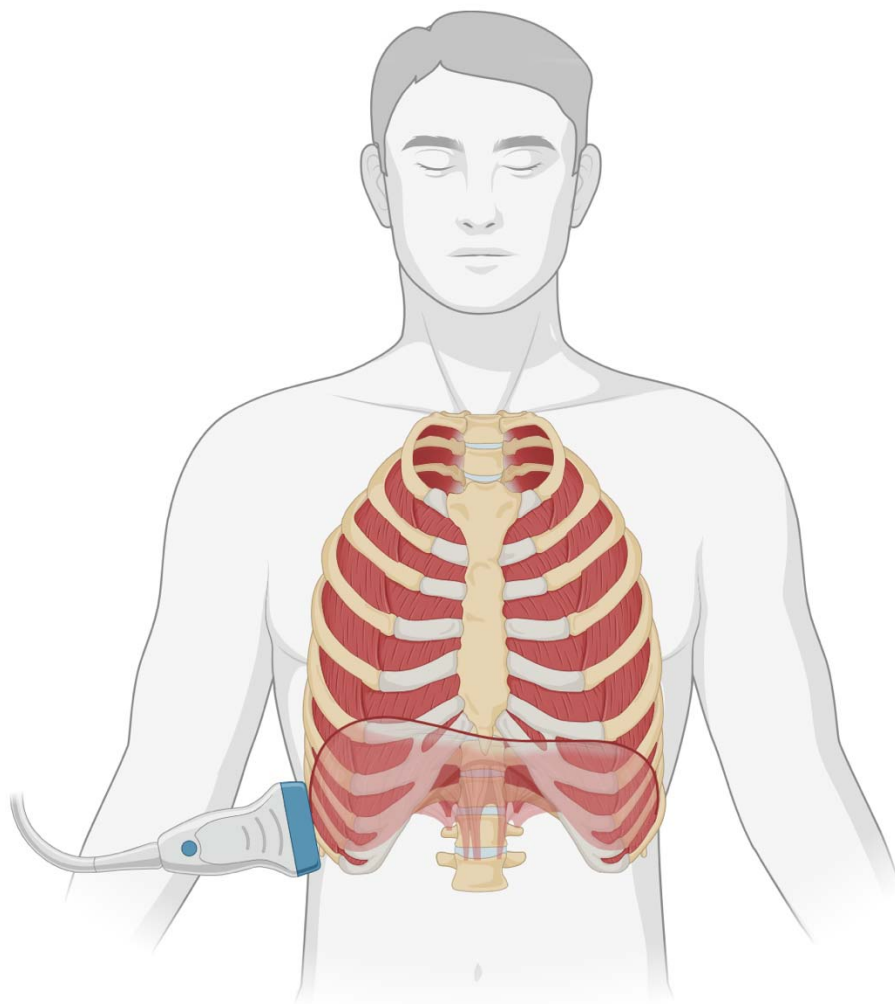



**Figure 3.** Clinical algorithm for ventilator weaning based on measurements of contractility and muscle thickness on diaphragm muscle ultrasound evaluation. Of the 21 participants in our study, 12 demonstrated intact contractility without significant atrophy, and were considered for ventilator weaning. Of the 9 participants with absent contractility, 7 showed normal diaphragm muscle thickness (no atrophy), and 2 of these eventually underwent diaphragm pacer placement. Of the patients with absent contractility, 2 also demonstrated significant atrophy, and were not candidates for diaphragm pacing.

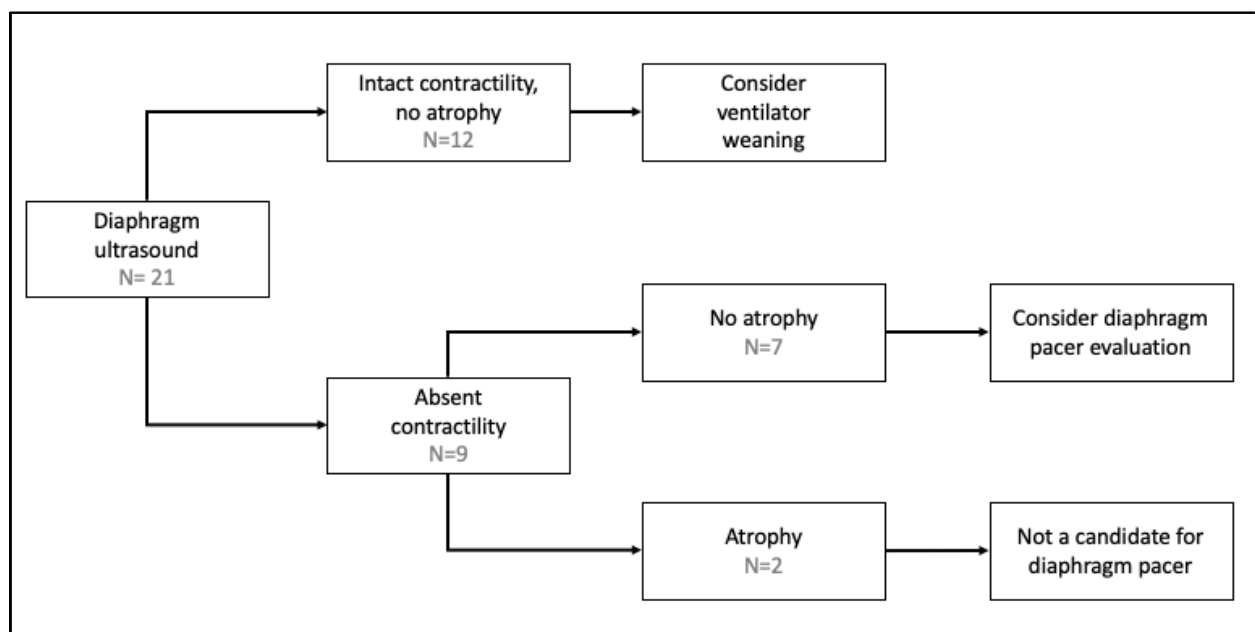

**Figure 4.** Illustration of upper vs lower motor neuron injury patterns at the C3 level of the spinal cord and peripheral nerve root. (A) Intact spinal cord and peripheral nerve, associated with a diaphragm with normal thickness. (B) Pure upper motor neuron spinal cord injury, which can result in impaired contractility of the diaphragm, but is associated with normal diaphragm thickness. (C) Lower motor neuron injury which can be associated with severe diaphragm atrophy due to axonal loss and denervation changes. (D) A mixed upper and lower motor neuron injury can result in severe diaphragm atrophy.

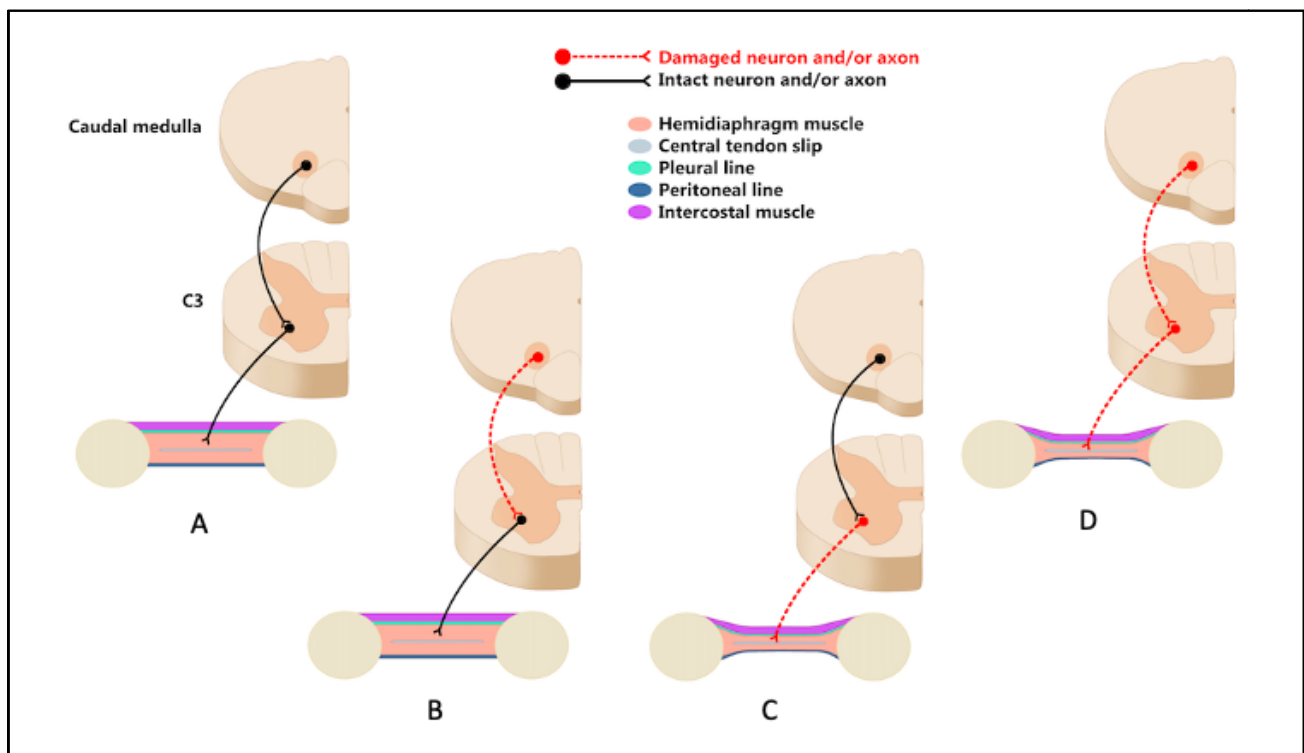

**Supplemental Figure 1.** Kaplan-Meier curve demonstrating the probability of successful ventilator weaning as a function of length of weaning process.

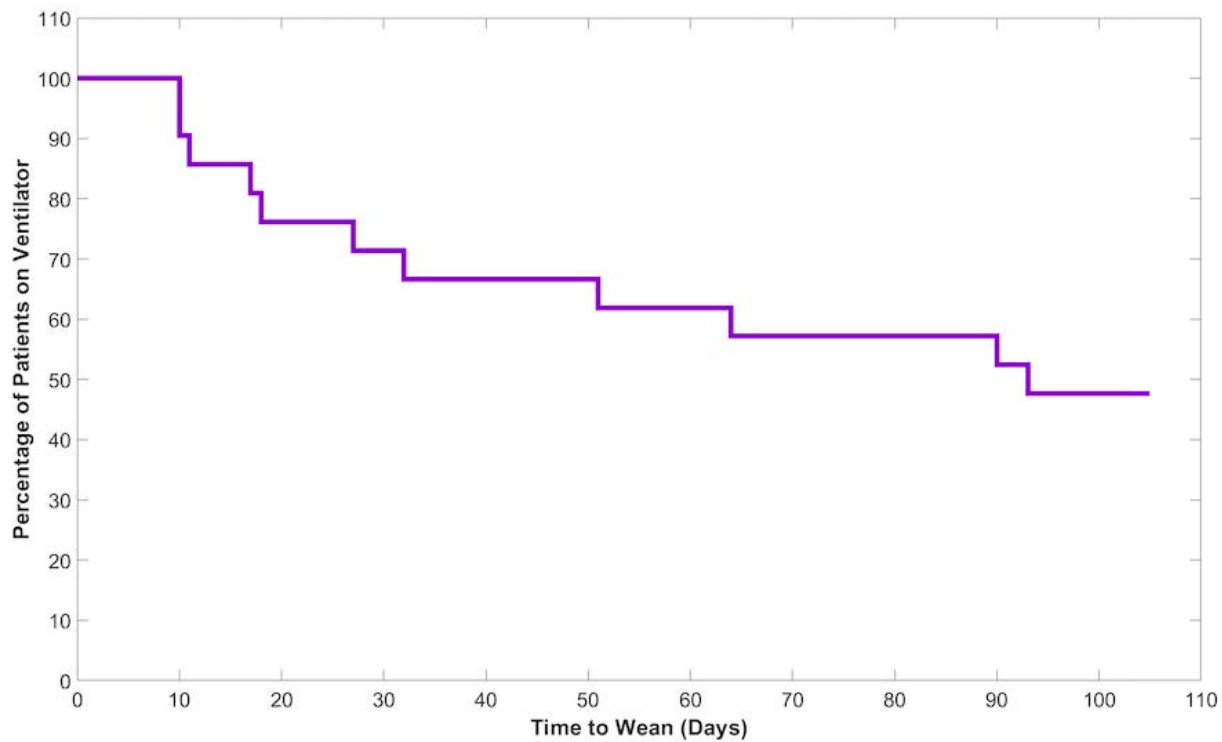

**Supplemental Figure 2.** The Receiver Operating Characteristic (ROC) curve has been plotted with an area under the curve (AUC) of 0.95, which indicates a high overall performance of the best thickening ratio as a diagnostic test for successful ventilator weaning at the chosen cutoff of 1.2. The sensitivity (true positive rate) at this cutoff is 100%, meaning that all successful weaning cases were correctly identified using this cutoff. The specificity (true negative rate) is 90%, indicating that 90% of the failures were correctly identified as such when using the cutoff of 1.2. A high sensitivity and specificity suggest that a cutoff of 1.2 for the best thickening ratio is a good threshold for predicting successful ventilator weaning.

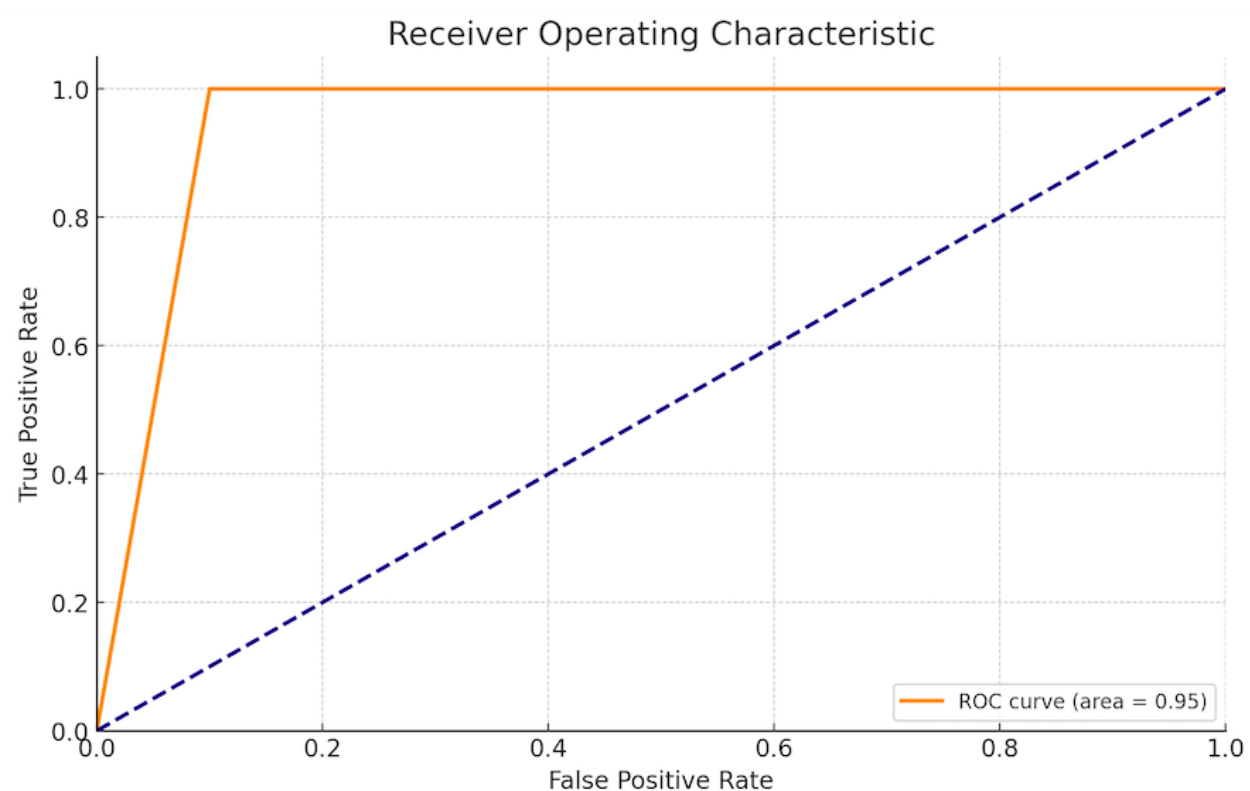

Source: https://medrxiv.org/content/medrxiv/early/2024/06/19/2024.02.28.24303260.full.pdf
